# Supplementary material
Source: PubMed Central journal article supplement (PMC5554367)
Supplement: NIHMS876144-supplement-supplement_1.pdf [file NIHMS876144-supplement-supplement_1.pdf]

**Supplementary Table 1: List of top 50 gene correlates of Ki67 from RNA sequencing of purified CD8 T cells at serial timepoints.**

| Gene             | Corr     | Gene            | Corr     | Gene           | Corr     | Gene           | Corr     | Gene                 | Corr     |
|------------------|----------|-----------------|----------|----------------|----------|----------------|----------|----------------------|----------|
| <i>MKI67</i>     | 1        | <i>HLA.DRB1</i> | 0.802198 | <i>CD38</i>    | 0.747253 | <i>BPGM</i>    | 0.714286 | <i>TRBV28</i>        | -0.73077 |
| <i>CTLA4</i>     | 0.884615 | <i>EPB41L4A</i> | 0.801117 | <i>RFC2</i>    | 0.74553  | <i>ANKS6</i>   | -0.70426 | <i>PPAN</i>          | -0.73453 |
| <i>HLA.DQB1</i>  | 0.884615 | <i>FADS2</i>    | 0.79952  | <i>ORMDL3</i>  | 0.741758 | <i>FAM213B</i> | -0.70621 | <i>PCDH1</i>         | -0.73453 |
| <i>CENPF</i>     | 0.873626 | <i>CDCA7</i>    | 0.785127 | <i>COL5A3</i>  | 0.740343 | <i>TRIO</i>    | -0.70702 | <i>C9orf89</i>       | -0.73829 |
| <i>RRM2</i>      | 0.855572 | <i>HAVCR2</i>   | 0.78022  | <i>TP53I11</i> | 0.737277 | <i>ZNF823</i>  | -0.70799 | <i>RP11.173A16.2</i> | -0.74003 |
| <i>KIR3DX1</i>   | 0.851243 | <i>LDLR</i>     | 0.769231 | <i>HLA.K</i>   | 0.737277 | <i>DKK3</i>    | -0.71626 | <i>CXXC5</i>         | -0.74102 |
| <i>KIF19</i>     | 0.846154 | <i>FBXO5</i>    | 0.763736 | <i>LMNB1</i>   | 0.730769 | <i>ZNF605</i>  | -0.72527 | <i>RP11.213G2.3</i>  | -0.74176 |
| <i>ARHGAP11A</i> | 0.82967  | <i>ITGAD</i>    | 0.760519 | <i>PRKAR1B</i> | 0.724521 | <i>VSIG1</i>   | -0.72902 | <i>GLTPD1</i>        | -0.74176 |
| <i>IFI6</i>      | 0.813187 | <i>ALDOC</i>    | 0.758242 | <i>CLSPN</i>   | 0.71978  | <i>MAMLD1</i>  | -0.72988 | <i>IKZF2</i>         | -0.74725 |
| <i>SYNGR1</i>    | 0.802198 | <i>GAMT</i>     | 0.751393 | <i>UBE2L6</i>  | 0.714286 | <i>DBN1</i>    | -0.73077 | <i>VCAN</i>          | -0.75929 |

**Supplementary Table 2: TCR sequences present among top 10 clones in the tumor and identified in peripheral blood.**

| 14784 | Nucleotide                                                                            | AA               | PBMC Freq (%) | TIL Freq (%) |
|-------|---------------------------------------------------------------------------------------|------------------|---------------|--------------|
| 1     | CCCCTGATCTGAGTGCAGCCCAACCCAGACCTCTGTACTTCTGTGCCAGCAGTCTATTACGAGCAGTACTTCGGGCCG        | CASSSYEQYF       | 8.04          | 0.31         |
| 2     | AGTGCCATCTGAAGACAGCAGCTTCTACATCTGAGTGTAGGAGCACCGGGACTATGATTCGGCTGAGCAGTCTTCGGGCCA     | CSARSTGMIRAEQFF  | 1.45          | 0.27         |
| 3     | CTGACTGTGAGCAACATGAGCCCTGAAGACAGCAGCATATATCTGTGACGCTCAAGGGGGATCTCTGAAGCTTCTTTGGACAA   | CSVQGGSPAEFF     | 1.38          | 0.22         |
| 4     | CTAAACCTGAGCTCTGGAGCTGGGGACTCAGCTTTGATTTCTGTGCCAGCAGCTGTAGGGGATGAGCAGTCTTCGGGCCA      | CASSVLGDEQFF     | 0.80          | 0.64         |
| 5     | CTGAATGTGAAGCCTTGTGCTGGGGACTCGGCCCTATCTGTGCCAGCAGCTTTAGGTCCGGGGAGCTTTTTTGGAGAA        | CASSFRSGELFF     | 0.43          | 0.25         |
| 6     | CTGCTGGGGTGGAGCTCGGCTCCCTCCAAACATCTGTACTTCTGTGCCAGCCGAGGGTTTTGGCTACACCTTCGGTTCG       | CASRQGFYTF       | 0.14          | 1.35         |
| 7     | ACTCTGACGATCCAGCCACACAGCAGGAGGACTCGGCCGTATCTCTGTGCCAGCAGCTTAGGGTACACCATATATTTGGAGAG   | CASSLGYTIYF      | 0.03          | 1.56         |
| 8     | CAGCCCTGCAGCCAGAACTCAGCCCTGTATCTGTGCCAGCAGCAAGTGCCTAGCGGCCCTACGAGCAGTACTTCGGGCCG      | CASSQVPSGPEYQF   | 0.03          | 0.82         |
| 9     | ACCAGTCCCACTCTGAAGACAGCAGCTTCTACATCTGAGTGTCCGGGGATCGGGCAGCGGGGACTGAAGCTTCTTTGGACAA    | CSAPGIGRRGTEAFF  | 0.00          | 0.27         |
| 10    | GCTGCTCCCTCCAGACATCTGTACTTCTGTGCCAGCAGTCTAACAGGGGTGGTATATACACCGGGAGCTTTTTTGGAGAA      | CASLTGVVIYTGELFF | 0.00          | 0.27         |
| 12288 | Nucleotide                                                                            | AA               | PBMC Freq (%) | TIL Freq (%) |
| 1     | CTGAAGTCCAGCCCTCAGAACCAGGGAAGCTCAGCTGTACTTCTGTGCCAGCAGTCCCTTGGGTACGAGCAGTACTTCGGGCCG  | CASSPLGYEQYF     | 2.37          | 0.42         |
| 2     | AGCACCTTGGAGCTGGGGACTCGGCCCTTATCTTTGCGCCAGCAGCGGGGGACAGCCAGCTCTCAGCAGCAGTACTTCGGGCCG  | CASSGGQASSYEQYF  | 0.30          | 0.58         |
| 3     | ATCCGCTCCACAAAGCTGGAGGACTCAGCCATGTACTTCTGTGCCAGCAGGACAAAGACCAGAACACTGAAGCTTCTTTGGACAA | CASRGQDQNTAEFF   | 0.24          | 0.89         |
| 4     | CTCAGGCTGGAGCTCGGCTCCCTCCAGACATCTGTACTTCTGTGCCAGCAGTGAACAGCAGCAGTGAAGCTTCTTTGGACAA    | CASSETDTEAFF     | 0.04          | 0.51         |
| 5     | CACCTACACACCCTGCAGCCAGAAGACTCGGCCGTATCTCTGTGCCAGCAGCAAAATCGGGGATAAGAGGCTTCTTTGGACAA   | CASSQIGDKTAEFF   | 0.02          | 1.12         |
| 6     | AAGATCCAGCCTGCAGAGCTTGGGACTCGGCCGTATCTCTGTGCCAGCAGCATACAAACACCGGGAGCTTTTTTGGAGAA      | CASSHTNTGELFF    | 0.01          | 0.57         |
| 7     | TTGGAGTCCGCTGCTCCCTCCAAACATCTGTACTTCTGTGCCAGCAGTACGGGGGACAGGGGCTGAAGCTTCTTTGGACAA     | CASSYGGQGPEAFF   | 0.01          | 0.44         |
| 8     | GAGATCCAGCAGCAGCAGCAGGGGACTCGGCCATGTATCTCTGTGCCAGCAGTCTAGTCCGGGGGAGGGAAGCTTCTTTGGACAA | CASSLVGGREAFF    | 0.00          | 1.30         |
| 14835 | Nucleotide                                                                            | AA               | PBMC Freq (%) | TIL Freq (%) |
| 1     | CAGCCCTGCAGCCAGAAGACTCAGCCCTGTATCTGTGCCAGCAGCTGGACAGGGGTATAATCAGCCCAAGCATTTCGGTGTAT   | CASSLDRGYNQPQHF  | 23.03         | 1.09         |
| 2     | CAACTGCAAGCTTGGAGACTCGGCCGTGTATCTGTGCCAGCAGCTTAATGGGGAGATGAACACTGAAGCTTCTTTGGACAA     | CASSFNGEMNTEAFF  | 0.01          | 1.36         |
| 13416 | Nucleotide                                                                            | AA               | PBMC Freq (%) | TIL Freq (%) |
| 1     | TTGGAGATCCAGCCACAGCAGCAGGGGACTCGGCCATGTATCTCTGTGCCAGCAGCTTCTCTTCCACCTCCACTTTGGGAAC    | CASSLSSSPLHF     | 15.16         | 1.42         |
| 2     | TCTAAGAAGCTCTCTCAGTACTCTGGCTTCTATCTCTGTGCCAGCAGGGGAGGCGACTATGGCTACACCTTCGGTTCG        | CAFVSRGGDYGYTF   | 14.59         | 0.65         |
| 3     | CTGAGCTCTCTGGAGCTGGGGACTCAGCTTTGATTTCTGTGCCAGCAGCCTCCGGCTGGGGCTGAAGCTTCTTTGGACAA      | CASSASAWAAEAF    | 7.38          | 1.34         |
| 4     | ATGAGCTCCTTGGAGCTGGGGACTCAGCCCTGTACTTCTGTGCCAGCAGCTCAGGACTAGGTGGAATGAGCAGTCTTCGGGCCA  | CASSRTRWNEQFF    | 6.73          | 0.78         |
| 5     | CTGAAGTCCAGCCCTCAGAACCAGGGAAGCTCAGCTGTACTTCTGTGCCAGCAGTGTAACTATGGCTACACCTTCGGTTCG     | CASSSANYGYTF     | 2.26          | 1.94         |
| 6     | GAACCTGAACATGAGCTCTTGGAGCTGGGGACTCAGCCCTGTACTTCTGTGCCAGCAGTCTATCTGATACGAGTATTTGGCCAA  | CASSSDTQYF       | 0.00          | 0.82         |
| 13471 | Nucleotide                                                                            | AA               | PBMC Freq (%) | TIL Freq (%) |
| 1     | TCTCTGGAGCTGGGGACTCAGCTTTGATTTCTGTGCCAGCAGCTAGGGGCTGTGAAACACCATATATTTTGGAGAG          | CASSVDRGSGNTIYF  | 5.80          | 0.60         |
| 2     | TCCGCTACCACTCCAGACACTGTGTACTTCTGTGCCAGCAGTACCTCGGCCGCCGCCAGATACGAGTATTTTGGCCCA        | CAISDLGGPAADTQYF | 0.84          | 0.29         |
| 14746 | Nucleotide                                                                            | AA               | PBMC Freq (%) | TIL Freq (%) |
| 1     | CCCAGCCCAACAGCAGCTCTGTACTTCTGTGCCAGCAGTTATGGGGCGGGGAGCTCTCAATAGCAGTCTTCGGGCCA         | CASSLWGGSSYNEQFF | 9.96          | 3.54         |
| 2     | CAGCCTGCAGAACTGGAGATTCTGGAGTTTATTCTGTGCCAGCAGCAACTGACAGGGGCTGACACTGAAGCTTCTTTGGACAA   | CASSQLTGADTEAFF  | 0.40          | 0.59         |

Pre – Tumor Burden

| Rank | Immune Subset                                           | IS    |
|------|---------------------------------------------------------|-------|
| 1    | CD8/Lag3+   Freq. of Parent (%)                         | 9.55  |
| 2    | CD8/Ki67+   Freq. of Parent (%)                         | 9.46  |
| 3    | CD4   Freq. of Parent (%)                               | 5.66  |
| 4    | CD4/Non-Tregs/Q4: CD45RA- , CD27-   Freq. of Parent (%) | 4.75  |
| 5    | CD4/Tregs/Tim3+   Freq. of Parent (%)                   | 3.05  |
| 6    | CD8   Freq. of Parent (%)                               | 2.96  |
| 7    | CD4/Non-Tregs/Q1: CD45RA- , CD27+   Freq. of Parent (%) | 2.57  |
| 8    | CD8/Eomes+   Freq. of Parent (%)                        | 0.76  |
| 9    | CD8/Tim3+   Freq. of Parent (%)                         | 0.51  |
| 10   | CD8/Gzmb+   Freq. of Parent (%)                         | 0.44  |
| 11   | CD8/naive   Freq. of Parent (%)                         | 0.22  |
| 12   | CD4/Non-Tregs/Q3: CD45RA+ , CD27-   Freq. of Parent (%) | 0.19  |
| 13   | CD4/Non-Tregs/Q2: CD45RA+ , CD27+   Freq. of Parent (%) | -0.04 |
| 14   | CD8/Q23: CD45RA+ , CD27-   Freq. of Parent (%)          | -0.23 |
| 15   | CD4/Tregs/PD1+   Freq. of Parent (%)                    | -0.54 |
| 16   | CD8/PD1+   Freq. of Parent (%)                          | -0.61 |
| 17   | CD8/Q24: CD45RA- , CD27+   Freq. of Parent (%)          | -0.66 |
| 18   | CD4/Non-Tregs/Lag3+   Freq. of Parent (%)               | -1.24 |
| 19   | CD8/Q21: CD45RA- , CD27+   Freq. of Parent (%)          | -1.39 |
| 20   | CD8/Q22: CD45RA+ , CD27+   Freq. of Parent (%)          | -1.81 |
| 21   | CD4/Non-Tregs/CTLA4+   Freq. of Parent (%)              | -1.83 |
| 22   | CD8/CD160+   Freq. of Parent (%)                        | -2.09 |
| 23   | CD4/Non-Tregs/PD1+   Freq. of Parent (%)                | -2.15 |
| 24   | CD4/Tregs/naive   Freq. of Parent (%)                   | -2.16 |
| 25   | CD4/Non-Tregs/Eomes+   Freq. of Parent (%)              | -2.19 |
| 26   | CD4/Non-Tregs/Ki67+   Freq. of Parent (%)               | -2.93 |
| 27   | CD4/Tregs   Freq. of Parent (%)                         | -3.09 |
| 28   | CD8/CTLA4+   Freq. of Parent (%)                        | -3.30 |
| 29   | CD4/Tregs/Ki67+   Freq. of Parent (%)                   | -3.73 |
| 30   | CD4/Tregs/Eomes+   Freq. of Parent (%)                  | -3.96 |
| 31   | CD4/Tregs/naive   Freq. of Parent (%)                   | -4.01 |
| 32   | CD4/Tregs/Lag3+   Freq. of Parent (%)                   | -4.08 |
| 33   | CD8/Tbet+   Freq. of Parent (%)                         | -4.78 |
| 34   | CD8/Gzmb+   Freq. of Parent (%)                         | -4.82 |
| 35   | CD4/Tregs/Gzmb+   Freq. of Parent (%)                   | -4.82 |
| 36   | CD4/Non-Tregs/Tbet+   Freq. of Parent (%)               | -7.01 |
| 37   | CD4/Non-Tregs/Gzmb+   Freq. of Parent (%)               | -7.48 |
| 38   | CD4/Tregs/CTLA4+   Freq. of Parent (%)                  | -7.61 |
| 39   | CD4/Non-Tregs   Freq. of Parent (%)                     | -7.85 |

Wk3 – Tumor Burden

| Rank | Immune Subset                                           | IS    |
|------|---------------------------------------------------------|-------|
| 1    | CD8/Ki67+   Freq. of Parent (%)                         | 32.47 |
| 2    | CD4/Non-Tregs/PD1+   Freq. of Parent (%)                | 17.58 |
| 3    | CD8/Lag3+   Freq. of Parent (%)                         | 13.41 |
| 4    | CD4/Tregs/Tim3+   Freq. of Parent (%)                   | 11.47 |
| 5    | CD8/CTLA4+   Freq. of Parent (%)                        | 8.04  |
| 6    | CD4/Non-Tregs/Lag3+   Freq. of Parent (%)               | 6.75  |
| 7    | CD4/Non-Tregs/Ki67+   Freq. of Parent (%)               | 5.92  |
| 8    | CD4/Non-Tregs/CTLA4+   Freq. of Parent (%)              | 2.74  |
| 9    | CD8/PD1+   Freq. of Parent (%)                          | 2.24  |
| 10   | CD8/Tim3+   Freq. of Parent (%)                         | 1.79  |
| 11   | CD8/Eomes+   Freq. of Parent (%)                        | 0.95  |
| 12   | CD4/Tregs/Tbet+   Freq. of Parent (%)                   | 0.42  |
| 13   | CD8/naive   Freq. of Parent (%)                         | 0.24  |
| 14   | CD4/Tregs/PD1+   Freq. of Parent (%)                    | 0.23  |
| 15   | CD4   Freq. of Parent (%)                               | -0.23 |
| 16   | CD8/Q21: CD45RA- , CD27+   Freq. of Parent (%)          | -0.51 |
| 17   | CD8/Q22: CD45RA+ , CD27+   Freq. of Parent (%)          | -0.67 |
| 18   | CD4/Tregs/Gzmb+   Freq. of Parent (%)                   | -0.71 |
| 19   | CD8/Q24: CD45RA- , CD27-   Freq. of Parent (%)          | -0.74 |
| 20   | CD4/Tregs/naive   Freq. of Parent (%)                   | -1.01 |
| 21   | CD4/Non-Tregs/Tim3+   Freq. of Parent (%)               | -1.10 |
| 22   | CD4/Non-Tregs/Q3: CD45RA+ , CD27-   Freq. of Parent (%) | -1.15 |
| 23   | CD4/Tregs/Eomes+   Freq. of Parent (%)                  | -1.35 |
| 24   | CD4/Non-Tregs/Q2: CD45RA+ , CD27+   Freq. of Parent (%) | -1.38 |
| 25   | CD8/CD160+   Freq. of Parent (%)                        | -1.53 |
| 26   | CD4/Non-Tregs/Gzmb+   Freq. of Parent (%)               | -1.99 |
| 27   | CD8/Gzmb+   Freq. of Parent (%)                         | -2.06 |
| 28   | CD4/Non-Tregs/Q4: CD45RA- , CD27-   Freq. of Parent (%) | -2.19 |
| 29   | CD4/Non-Tregs   Freq. of Parent (%)                     | -2.19 |
| 30   | CD4/Non-Tregs   Freq. of Parent (%)                     | -2.25 |
| 31   | CD4/Tregs   Freq. of Parent (%)                         | -2.28 |
| 32   | CD8/Q23: CD45RA+ , CD27-   Freq. of Parent (%)          | -2.35 |
| 33   | CD4/Non-Tregs/Eomes+   Freq. of Parent (%)              | -2.43 |
| 34   | CD4/Non-Tregs/Q1: CD45RA- , CD27+   Freq. of Parent (%) | -2.72 |
| 35   | CD4/Tregs/Ki67+   Freq. of Parent (%)                   | -2.94 |
| 36   | CD4/Non-Tregs/Tbet+   Freq. of Parent (%)               | -3.27 |
| 37   | CD4/Tregs/Lag3+   Freq. of Parent (%)                   | -3.36 |
| 38   | CD8/Tbet+   Freq. of Parent (%)                         | -3.83 |
| 39   | CD4/Tregs/CTLA4+   Freq. of Parent (%)                  | -5.76 |

Pre – PFS

| Rank | Immune Subset                                           | IS    |
|------|---------------------------------------------------------|-------|
| 1    | CD8/CD160+   Freq. of Parent (%)                        | 30.75 |
| 2    | CD8/Ki67+   Freq. of Parent (%)                         | 14.48 |
| 3    | CD4/Non-Tregs/Q3: CD45RA+ , CD27-   Freq. of Parent (%) | 11.54 |
| 4    | CD8/Lag3+   Freq. of Parent (%)                         | 7.30  |
| 5    | CD4/Non-Tregs/Q4: CD45RA- , CD27-   Freq. of Parent (%) | 3.66  |
| 6    | CD4/Tregs/Lag3+   Freq. of Parent (%)                   | 3.53  |
| 7    | CD4/Non-Tregs/Ki67+   Freq. of Parent (%)               | 3.15  |
| 8    | CD8/Tbet+   Freq. of Parent (%)                         | 2.71  |
| 9    | CD8/Gzmb+   Freq. of Parent (%)                         | 2.04  |
| 10   | CD4/Non-Tregs/CTLA4+   Freq. of Parent (%)              | 1.63  |
| 11   | CD4/Non-Tregs/Tbet+   Freq. of Parent (%)               | 1.23  |
| 12   | CD8/Q22: CD45RA- , CD27+   Freq. of Parent (%)          | 0.70  |
| 13   | CD4/Non-Tregs/PD1+   Freq. of Parent (%)                | 0.70  |
| 14   | CD8/CTLA4+   Freq. of Parent (%)                        | 0.42  |
| 15   | CD8/Eomes+   Freq. of Parent (%)                        | 0.22  |
| 16   | CD4/Non-Tregs/Eomes+   Freq. of Parent (%)              | -0.39 |
| 17   | CD4   Freq. of Parent (%)                               | -0.49 |
| 18   | CD4/Non-Tregs/Lag3+   Freq. of Parent (%)               | -0.66 |
| 19   | CD4/Non-Tregs/Tim3+   Freq. of Parent (%)               | -1.02 |
| 20   | CD8   Freq. of Parent (%)                               | -1.58 |
| 21   | CD4/Non-Tregs/PD1+   Freq. of Parent (%)                | -1.61 |
| 22   | CD4/Tregs/Tim3+   Freq. of Parent (%)                   | -1.81 |
| 23   | CD8/Q23: CD45RA+ , CD27-   Freq. of Parent (%)          | -1.82 |
| 24   | CD4/Tregs/Ki67+   Freq. of Parent (%)                   | -2.14 |
| 25   | CD4/Non-Tregs   Freq. of Parent (%)                     | -2.90 |
| 26   | CD4/Tregs/Tbet+   Freq. of Parent (%)                   | -2.98 |
| 27   | CD8/naive   Freq. of Parent (%)                         | -3.09 |
| 28   | CD8/Tim3+   Freq. of Parent (%)                         | -3.28 |
| 29   | CD8/Q24: CD45RA- , CD27-   Freq. of Parent (%)          | -3.60 |
| 30   | CD4/Tregs/naive   Freq. of Parent (%)                   | -3.61 |
| 31   | CD8/Q21: CD45RA- , CD27+   Freq. of Parent (%)          | -3.95 |
| 32   | CD4/Tregs/CTLA4+   Freq. of Parent (%)                  | -3.99 |
| 33   | CD4/Non-Tregs/Q1: CD45RA- , CD27+   Freq. of Parent (%) | -4.00 |
| 34   | CD8/PD1+   Freq. of Parent (%)                          | -4.20 |
| 35   | CD4/Tregs/Gzmb+   Freq. of Parent (%)                   | -4.65 |
| 36   | CD4/Tregs   Freq. of Parent (%)                         | -5.03 |
| 37   | CD4/Non-Tregs/Gzmb+   Freq. of Parent (%)               | -5.20 |
| 38   | CD4/Tregs/Eomes+   Freq. of Parent (%)                  | -5.83 |
| 39   | CD4/Non-Tregs/Q2: CD45RA+ , CD27+   Freq. of Parent (%) | -6.61 |

Wk3 – PFS

| Rank | Immune Subset                                           | IS    |
|------|---------------------------------------------------------|-------|
| 1    | CD4/Non-Tregs/Tbet+   Freq. of Parent (%)               | 18.02 |
| 2    | CD4/Non-Tregs/Q3: CD45RA+ , CD27-   Freq. of Parent (%) | 16.01 |
| 3    | CD8/CTLA4+   Freq. of Parent (%)                        | 12.41 |
| 4    | CD8/CTLA4+   Freq. of Parent (%)                        | 10.32 |
| 5    | CD4/Non-Tregs/Eomes+   Freq. of Parent (%)              | 6.45  |
| 6    | CD4/Non-Tregs/Tbet+   Freq. of Parent (%)               | 3.49  |
| 7    | CD8/Gzmb+   Freq. of Parent (%)                         | 2.84  |
| 8    | CD8   Freq. of Parent (%)                               | 2.36  |
| 9    | CD8/PD1+   Freq. of Parent (%)                          | 1.51  |
| 10   | CD4/Non-Tregs   Freq. of Parent (%)                     | 1.54  |
| 11   | CD8/Q24: CD45RA- , CD27-   Freq. of Parent (%)          | 1.34  |
| 12   | CD8/Tim3+   Freq. of Parent (%)                         | 1.16  |
| 13   | CD4/Non-Tregs/Ki67+   Freq. of Parent (%)               | 0.88  |
| 14   | CD8/Eomes+   Freq. of Parent (%)                        | 0.66  |
| 15   | CD4   Freq. of Parent (%)                               | 0.58  |
| 16   | CD4/Tregs/PD1+   Freq. of Parent (%)                    | 0.39  |
| 17   | CD4/Tregs/Ki67+   Freq. of Parent (%)                   | -0.38 |
| 18   | CD4/Tregs/Eomes+   Freq. of Parent (%)                  | -0.46 |
| 19   | CD8/Q22: CD45RA+ , CD27+   Freq. of Parent (%)          | -0.83 |
| 20   | CD4/Tregs/Lag3+   Freq. of Parent (%)                   | -0.91 |
| 21   | CD4/Non-Tregs/PD1+   Freq. of Parent (%)                | -0.92 |
| 22   | CD4/Non-Tregs/Gzmb+   Freq. of Parent (%)               | -1.06 |
| 23   | CD8/CD160+   Freq. of Parent (%)                        | -1.56 |
| 24   | CD4/Tregs/Tim3+   Freq. of Parent (%)                   | -1.74 |
| 25   | CD4/Non-Tregs/CTLA4+   Freq. of Parent (%)              | -2.05 |
| 26   | CD4/Non-Tregs/Tim3+   Freq. of Parent (%)               | -2.28 |
| 27   | CD4/Tregs/naive   Freq. of Parent (%)                   | -2.42 |
| 28   | CD4/Non-Tregs/Lag3+   Freq. of Parent (%)               | -2.67 |
| 29   | CD8/Tbet+   Freq. of Parent (%)                         | -2.68 |
| 30   | CD4/Non-Tregs/Q2: CD45RA+ , CD27+   Freq. of Parent (%) | -2.75 |
| 31   | CD4/Non-Tregs/Q1: CD45RA- , CD27+   Freq. of Parent (%) | -2.88 |
| 32   | CD4/Tregs/CTLA4+   Freq. of Parent (%)                  | -2.96 |
| 33   | CD4/Non-Tregs/Q4: CD45RA- , CD27-   Freq. of Parent (%) | -3.02 |
| 34   | CD4/Tregs/Gzmb+   Freq. of Parent (%)                   | -3.12 |
| 35   | CD8/Q23: CD45RA+ , CD27-   Freq. of Parent (%)          | -3.12 |
| 36   | CD8/Q21: CD45RA- , CD27+   Freq. of Parent (%)          | -4.06 |
| 37   | CD8/naive   Freq. of Parent (%)                         | -4.57 |
| 38   | CD8/Ki67+   Freq. of Parent (%)                         | -5.08 |
| 39   | CD8/Lag3+   Freq. of Parent (%)                         | -5.30 |

Supplementary Table 3: Bootstrap importance scores in 39 immune parameters predicted by changes in tumor burden (left), and progression free survival (right) generated by random forest analysis at pre treatment and week 3.
